# Supplementary material
Source: PubMed Central journal article supplement (PMC3624592)
Supplement: JB.02090-12_zjb999092553so1.pdf [file JB.02090-12_zjb999092553so1.pdf]

**Table S1.** DNA sequences of the oligonucleotides used in this study

| <b>Primer</b>  | <b>Sequence 5'-3'</b>                                         | <b>Purpose</b>                            |
|----------------|---------------------------------------------------------------|-------------------------------------------|
| s089WF         | GGGTGACTCCTTCAAAACCAACATAAGGAGTCACCAGTGTAGGCTGGAGCTGCTTCG     | Deletion of <i>s089</i> from SXT          |
| s089WR         | GAGTGTACTTGGTTTTTTCATGATGTTCTCCTCGTCATTCGGGGATCCGTCGACC       | Deletion of <i>s089</i> from SXT and R391 |
| ssb1WF         | GTGTGCACTGAGTTCAACTAAGACGAGGAGAACATCGTGTAGGCTGGAGCTGCTTCG     | Deletion of <i>ssb</i> from SXT           |
| ssb1WR         | AAGTACTCCCGCTGGGTTAAAGCGTTTTTGTCTCGGATTCGGGGATCCGTCGACC       | Deletion of <i>ssb</i> from SXT           |
| R66WF          | GGGTGACTCCTTCAAAACCAAAATATGGAGTCACCAGTGTAGGCTGGAGCTGCTTCG     | Deletion of <i>s089</i> from R391         |
| ssb2WF         | GTGTGCACAGAGTTCAACTAAGACGAGGAGAACATCGTGTAGGCTGGAGCTGCTTCG     | Deletion of <i>ssb</i> from R391          |
| ssb2WR         | AAGTACTCCCGCTGGGTTAAAGCGTTTTTGTCTCGGATTCGGGGATCCGTCGACC       | Deletion of <i>ssb</i> from R391          |
| setD2wF        | CTATCGCAATATTTTACATGAAGTGGAGGTCGGTCAATTCGGGGATCCGTCGACC       | Deletion of <i>setDC</i> from SXT         |
| setC2wR        | CACGGGCGGTGCACAATCAAATCATGTATCAGCATGGTGTAGGCTGGAGCTGCTTCG     | Deletion of <i>setDC</i> from SXT         |
| 65lacZ42BF     | ATTGTCCGGAGTCCACAATGGAAAAACCAAGCTAATCCAAGCCGCTGTTTTACAACGTCGT | LacZ fusion of <i>bet</i> in SXT          |
| 65lacZ42BR     | AGAATAATCCCGTCAGGGTTAGTAAAATGAATGCGTGGCGGTGTAGGCTGGAGCTGCTTCG | LacZ fusion of <i>bet</i> in SXT          |
| 66lacZ42BF     | CCTCAAAGGAGACAATATGAAGGTATCGACCTATCACAAGCCGCTGTTTTACAACGTCGT  | LacZ fusion of <i>exo</i> in SXT          |
| 66lacZ42BR     | AGCGCATGAGAAAGGAGCCGAAATCGGCTCCAAGTGAACGGTGTAGGCTGGAGCTGCTTCG | LacZ fusion of <i>exo</i> in SXT          |
| setDF          | CTGGAATTCGCAAAGAGTGCCTTTCTATCTA                               | Construction of pGG2B                     |
| setC2R         | TTGCTTAAGTAGTACTCTCAAAGTGCACG                                 | Construction of pGG2B                     |
| orfZTOPOF      | TAATTTGGAGATCTTCCATGACTAA                                     | Construction of pGG7                      |
| corfZR         | TTACTTTGCAGCTTGCTAAC                                          | Construction of pGG7                      |
| 6389F          | CGATTCCGTAAGCGCACTGACC                                        | Construction of pGG32                     |
| 6389R          | CGAGCAAGCAATCGCAAAAGCG                                        | Construction of pGG32                     |
| s089-C         | TGCAAAACTGAGCTGGTCG                                           | RT-qPCR <i>s089</i>                       |
| s089-D         | GTCGTAAGTGTGGCTCTTTG                                          | RT-qPCR <i>s089</i>                       |
| ssb-A          | TTCCGAGATCGTGGTGGATTAA                                        | RT-qPCR <i>ssb</i>                        |
| ssb-B          | CAGATGCTTTGTTCACATTAATCAAG                                    | RT-qPCR <i>ssb</i>                        |
| bet-A          | AAACAAAGTCTCCCTGGATGG                                         | RT-qPCR <i>bet</i>                        |
| bet-B          | ATGGACCATCTACACGGTAAGG                                        | RT-qPCR <i>bet</i>                        |
| exo-A          | ACTTTCTTCTGCCGTTATGTGC                                        | RT-qPCR <i>exo</i>                        |
| exo-B          | GATGCTGTAAGTGCACCCAATA                                        | RT-qPCR <i>exo</i>                        |
| orfZ-A         | GACTAAATCAGCCTCACTTTTTCG                                      | RT-qPCR <i>orfZ</i>                       |
| orfZ-B         | CTTTGCAGCTTGCTAACCC                                           | RT-qPCR <i>orfZ</i>                       |
| RTlacZF        | GTGACGCTCTCGTTGCTGCAT                                         | RT-qPCR <i>lacZ</i>                       |
| RTlacZR        | CACCCGTCATATAAAGAACTG                                         | RT-qPCR <i>lacZ</i>                       |
| s073RT         | GCATGACGAGTCACCACGACAG                                        | Reverse transcription <i>s073</i>         |
| TSS89up4       | GTTTAAGGAGGCTAGCTACCTC                                        | Primer extension analysis                 |
| betTAlacZF1    | TAAGGAGTCCACAATGGAAAAACC                                      | Construction of pDPL373                   |
| betTAlacZF2    | TAACCACTTTGATTGTCCGGAGTCC                                     | Construction of pDPL374                   |
| betTAlacZF3    | TAAGGGAGTACTTCCCGTCAGG                                        | Construction of pDPL375                   |
| exoTAlacZF1    | TAAAGGAGACAATATGAAGTTATCG                                     | Construction of pDPL376                   |
| exoTAlacZF2    | TAATTTCTCTCCCTCGGGGAGTCT                                      | Construction of pDPL377                   |
| exoTAlacZF3    | TAAAGGGAGTCTCTCTCTCCGTCGG                                     | Construction of pDPL378                   |
| lacZTAccommonR | TTATTTTGGACACCAGACCAACTGG                                     | Construction of pDPL plasmids             |



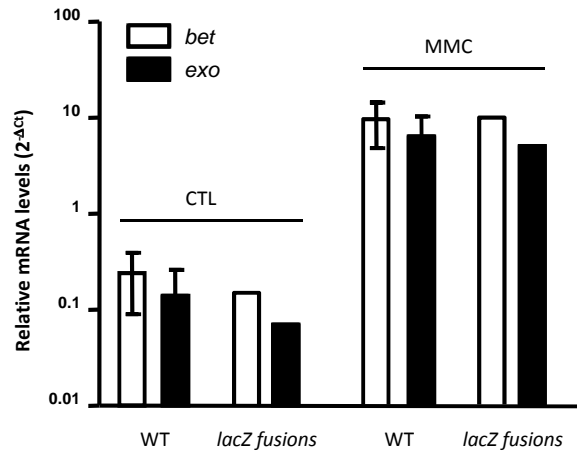

**Figure S1.** Comparison of mRNA levels of *bet* and *exo* in a WT context and of *lacZ* in the *bet*'-'*lacZ* and *exo*'-'*lacZ* fusions, in control (CTL) and MMC-induced conditions (MMC). Results are expressed as the relative transcription of each gene compared to *rpoZ* ( $2^{-\Delta C_t}$ ).

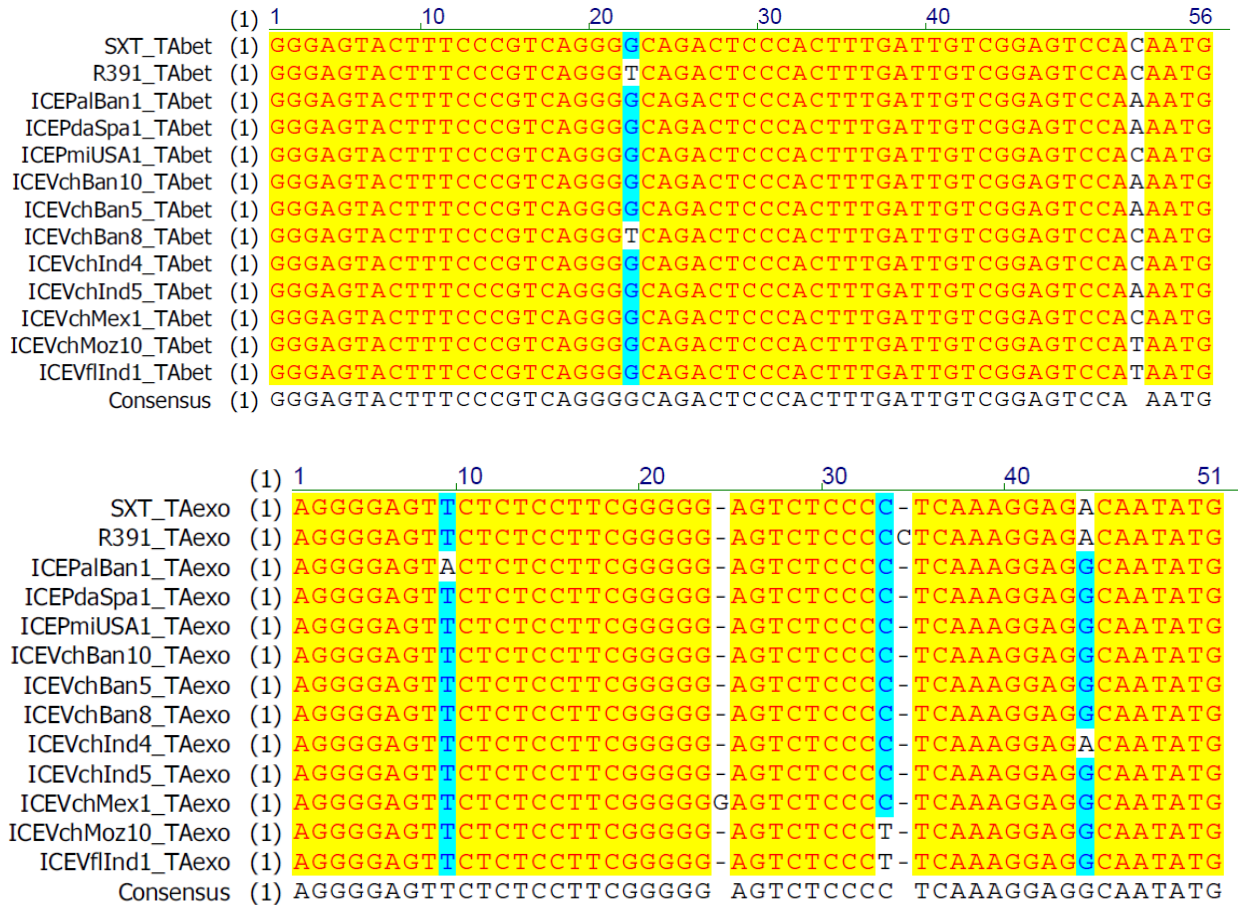

**Figure S2.** Alignment of the predicted translational attenuators found upstream *bet* (TA $\beta$ et) and upstream *exo* (TA $\beta$ exo) in sequenced SXT/R391 ICEs.

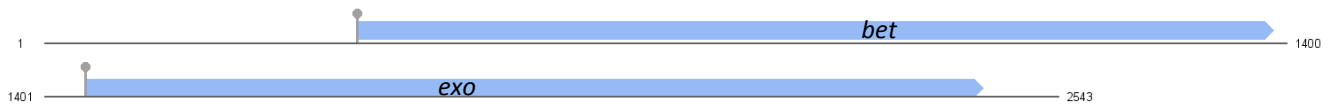

**Figure S3.** Translational attenuators predicted by RibEx upstream *bet* and *exo* in IncA/C plasmid pIP1202.

|                 |     |                   |     |          |          |       |     |       |        |    |        |    |       |        |       |       |    |       |      |
|-----------------|-----|-------------------|-----|----------|----------|-------|-----|-------|--------|----|--------|----|-------|--------|-------|-------|----|-------|------|
|                 | (1) | 1                 | 10  | 20       | 30       | 40    | 50  | 60    | 70     | 80 |        |    |       |        |       |       |    |       |      |
| SXT Ig bet-orfZ | (1) | CGCCACGCATTCATTTT | ACT | AACCCTGA | CGGGATTA | TTCTC | CGT | CA    | GGGGGA | AG | GTCTC  | GT | CT    | TTTTTT | GGAGA | TCT   | T  |       |      |
| SXT Ig orfZ-exo | (1) | -----             | CC  | ACT      | AACCCTGA | AGGG  | GAG | TTCTC | TCC    | T  | GGGGGA | -- | GTCTC | CC     | CT    | CAAA  | -- | GGAGA | CAAT |
| Consensus       | (1) |                   |     | ACT      | AACCCTGA | GGG   |     | TTCTC | C      | T  | GGGGGA |    | GTCTC | CT     |       | GGAGA |    |       | T    |

---

(81) 882  
SXT Ig bet-orfZ (80) CC  
SXT Ig orfZ-exo (61) --  
Consensus (81)

Section 2

**Figure S4.** Alignment of the intergenic regions located between *bet* and *orfZ* (Ig bet-orfZ) and between *orfZ* and *exo* (Ig orfZ-exo) in SXT.
